# Supplementary material
Source: publisher figshare collection journal article supplement (https://acs.figshare.com/ndownloader/files/5058745)
Supplement: Supplementary file 1 [file 5058745]

## Support Information

**Synthesis of PMMA Star (A)<sub>f</sub>-DC.** A 100:2:2 equiv mixture of MMA (10 mL), VBDC (0.499 g), and BMIM (0.336 g) (50 wt% THF solution) was photo-polymerized at 30°C for 1 h. In no case were cross-linked or insoluble materials observed. In a previous work,<sup>1</sup> we performed the first-order time-conversion plots in this photo-polymerization system. The straight line in the semilogarithmic coordinates indicated not only first order in monomer but also a constant concentration of the active species. The plot of  $M_w$  against conversion fitted well to the straight line. We concluded that free radical polymerization proceeded by a living radical mechanism. We also proved that soluble microgel formed predominantly in the initial stage by determining the composition of phenyl and MMA units as a parameter of conversion.

## References and Notes

- (1) Ishizu, K.; Park, J.; Shibuya, T.; Sogabe, A. *Macromolecules* **2003**, *36*, 2990.
